# Supplementary material for: Channeled PM10, PM2.5 and PM1 Emission Factors Associated with the Ceramic Process and Abatement Technologies
Source: MDPI journal article supplement (doi:10.3390/ijerph19159652), 2022-08-05
Supplement: s1 [file s1]

---

## Supporting Information:

Figure S1. PSD of emissions generated in ambient temperature processes

Figure S2. PSD of emissions generated in medium temperature processes

Figure S3. PSD of emissions generated in high temperature processes

Table S1: Individual samplings of ambient temperature processes

Table S2. Individual samplings of medium and high temperature processes

Figure S4. PM10 and PM2.5 composition of emissions generated during spray-drying emissions

Figure S5. PM10 and PM2.5 composition of emissions generated during pressing

Figure S6. PM10 and PM2.5 composition of emissions generated during drying

Figure S7. PM10 and PM2.5 composition of emissions generated during firing (raw emissions)

Figure S8. PM10 and PM2.5 composition of emissions generated during firing (after cleaning system)

Figure S9. PM10 and PM2.5 composition of emissions generated during frit melting

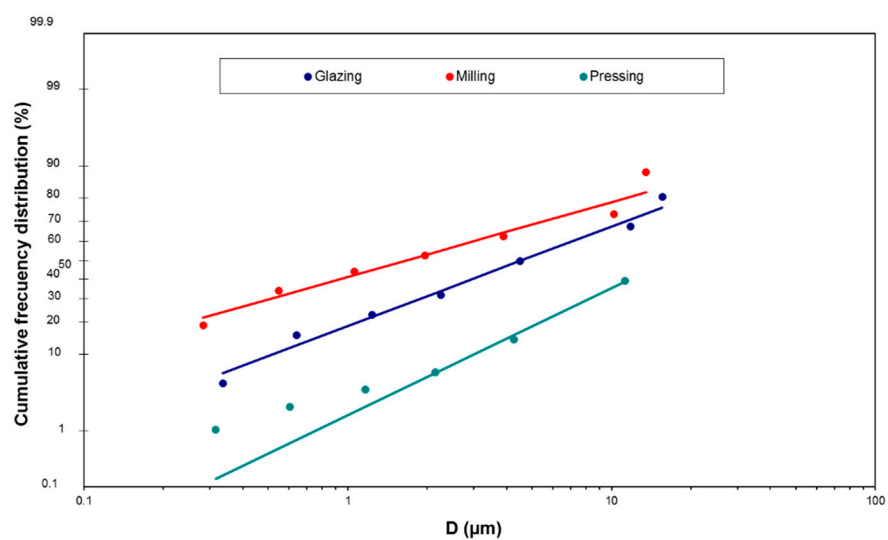

**Figure S1.** PSD of emissions generated in ambient temperature processes

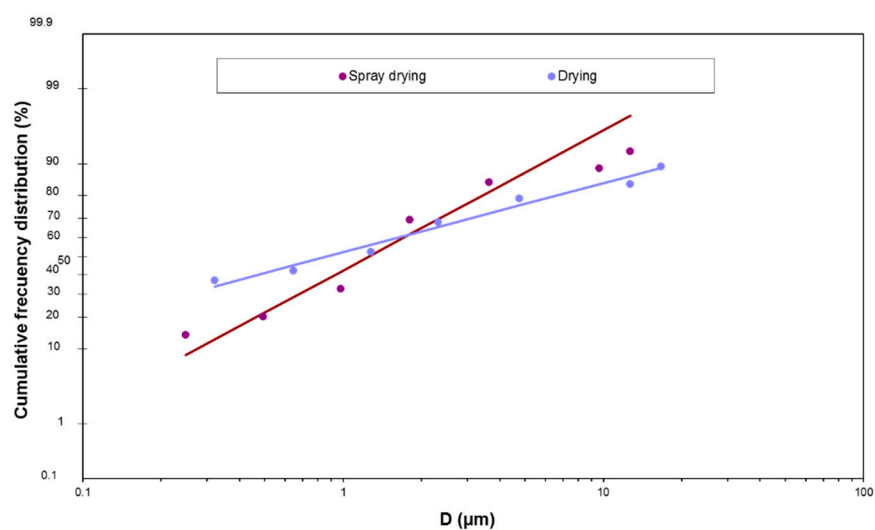

**Figure S2.** PSD of emissions generated in medium temperature processes

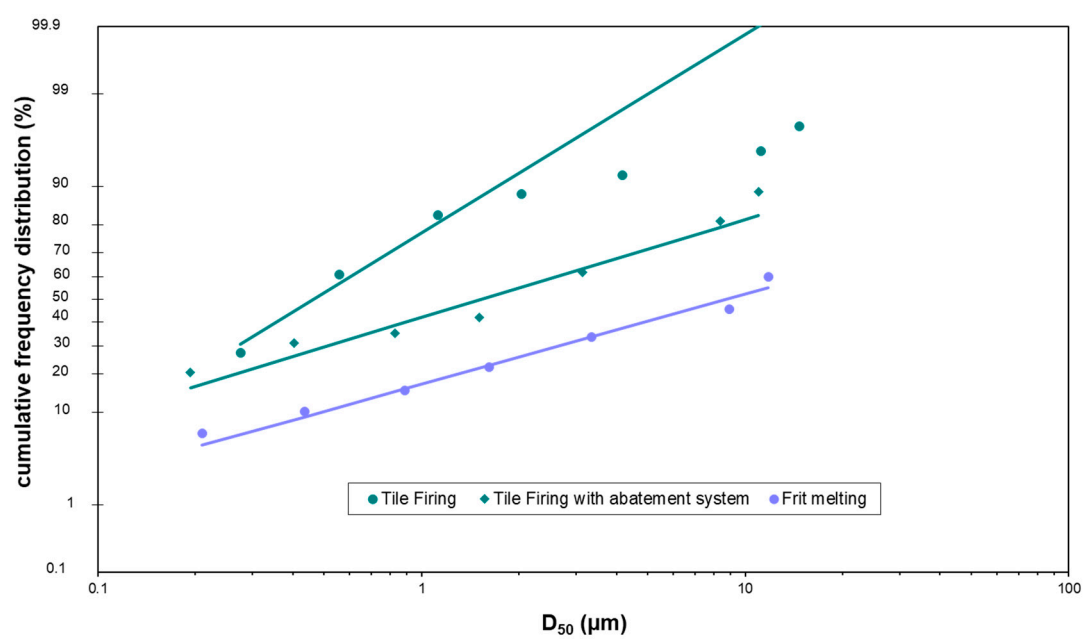

**Figure S3.** PSD of emissions generated in high temperature processes

**Table S1.** Individual samplings of ambient temperature processes

| Type of process             | Process stage | Treatment system | T <sub>gases</sub> (°C) | C <sub>TI</sub> (mg/Nm <sup>3</sup> ) | Parameters of the log-normal adjustment |                |                | w <sub>10</sub> (%) | w <sub>2.5</sub> (%) | w <sub>1</sub> (%) |
|-----------------------------|---------------|------------------|-------------------------|---------------------------------------|-----------------------------------------|----------------|----------------|---------------------|----------------------|--------------------|
|                             |               |                  |                         |                                       | D <sub>g</sub> (μm)                     | σ <sub>g</sub> | R <sup>2</sup> |                     |                      |                    |
| Ambient temperature process | Milling       | Fabric filter    | 15 - 30                 | <5                                    | 3.5                                     | 8.5            | 0.9974         | 68.7                | 43.7                 | 27.9               |
|                             |               |                  |                         | <5                                    | 1.2                                     | 16.9           | 0.9827         | 77.7                | 60.7                 | 47.9               |
|                             |               |                  |                         | <5                                    | 1.0                                     | 7.1            | 0.9279         | 88.3                | 68.5                 | 50.6               |
|                             |               |                  |                         | <5                                    | 4.3                                     | 9.6            | 0.9759         | 64.6                | 40.6                 | 25.6               |
|                             | Pressing      | Before treatment | 15 - 30                 | 109±33                                | 25.0                                    | 3.1            | 0.9981         | 21.0                | 2.1                  | 0.2                |
|                             |               | Fabric filter    |                         | <5                                    | 4.7                                     | 3.1            | 0.9532         | 75.3                | 28.9                 | 8.5                |
|                             | Glazing       | Before treatment | 15 - 40                 | 233±70                                | 17.2                                    | 4.9            | 0.9903         | 36.7                | 11.3                 | 3.7                |
|                             |               |                  |                         | 27±9                                  | 5.5                                     | 4.0            | 0.9519         | 66.8                | 28.8                 | 11.2               |
|                             |               | Fabric filter    |                         | <5                                    | 1.6                                     | 6.5            | 0.9824         | 83.8                | 59.6                 | 40.2               |
|                             |               |                  |                         | <5                                    | 8.0                                     | 3.5            | 0.9901         | 57.0                | 17.7                 | 4.9                |
|                             |               |                  |                         | <5                                    | 2.7                                     | 4.0            | 0.9840         | 82.8                | 47.8                 | 23.7               |

**Table S2.** Individual samplings of medium and high temperature processes

| Type of process                      | Process stage | Treatment system           | T <sub>gases</sub> (°C) | C <sub>Tl</sub> (mg/Nm <sup>3</sup> ) | Parameters of the log-normal adjustment |                |                | W <sub>10</sub> (%) | W <sub>2.5</sub> (%) | W <sub>1</sub> (%) |
|--------------------------------------|---------------|----------------------------|-------------------------|---------------------------------------|-----------------------------------------|----------------|----------------|---------------------|----------------------|--------------------|
|                                      |               |                            |                         |                                       | D <sub>g</sub> (μm)                     | σ <sub>g</sub> | R <sup>2</sup> |                     |                      |                    |
| Medium<br>high temperature processes | Drying        | No apply                   | 110-120                 | <5                                    | 0.9                                     | 11.0           | 0.9799         | 84.5                | 66.9                 | 52.2               |
|                                      | Spray drying  | Cyclone                    | 80                      | >1000                                 | 1.8/20.5*                               | 2.0/1.1*       | 0.9991         | 73.4                | 41.3                 | 21.8               |
|                                      |               |                            |                         | <5                                    | 1.2                                     | 9.3            | 0.9151         | 83.0                | 63.0                 | 46.8               |
|                                      |               |                            |                         | <5                                    | 4.5                                     | 5.8            | 0.9953         | 67.8                | 37.0                 | 19.7               |
|                                      |               |                            |                         | 99±30                                 | 1.6                                     | 1.7            | 0.9748         | 99.9                | 81.8                 | 19.0               |
|                                      |               | Wet scrubber               | 60-65                   | 52±16                                 | 0.7                                     | 4.9            | 0.9729         | 95.4                | 79.3                 | 59.4               |
|                                      | Firing        | Before treatment           | 160-210                 | 14±4                                  | 0.6                                     | 2.2            | 0.9967         | 99.9                | 97.1                 | 77.0               |
|                                      |               | Fabric filter              | 140-160                 | 8±2                                   | 0.4                                     | 4.2            | 0.9197         | 98.9                | 90.6                 | 74.9               |
|                                      |               |                            |                         | <5                                    | 1.7                                     | 8.3            | 0.9405         | 80.2                | 57.7                 | 40.6               |
|                                      |               |                            |                         | <5                                    | 1.5                                     | 7.6            | 0.9721         | 83.0                | 60.6                 | 42.8               |
|                                      | Frits melting | Before treatment           | 220-300                 | 734±299                               | 1.8 / 21.0*                             | 2.6 / 1.1*     | 0.9997         | 77.5                | 51.1                 | 21.2               |
|                                      |               |                            |                         | 223±67                                | 0.7 / 11.7*                             | 2.5 / 1.3*     | 1.0000         | 76.3                | 62.9                 | 45.7               |
|                                      |               |                            |                         | 287±86                                | 0.3 / 21.5*                             | 2.5 / 1.3*     | 0.9994         | 69.4                | 68.7                 | 62.9               |
|                                      |               | Fabric filter              | 110-210                 | <5                                    | 1.4                                     | 7.8            | 0.9808         | 83.1                | 61.1                 | 43.5               |
|                                      |               | Electrostatic precipitator |                         | <5                                    | 1.0                                     | 6.9            | 0.9724         | 88.0                | 67.5                 | 49.2               |

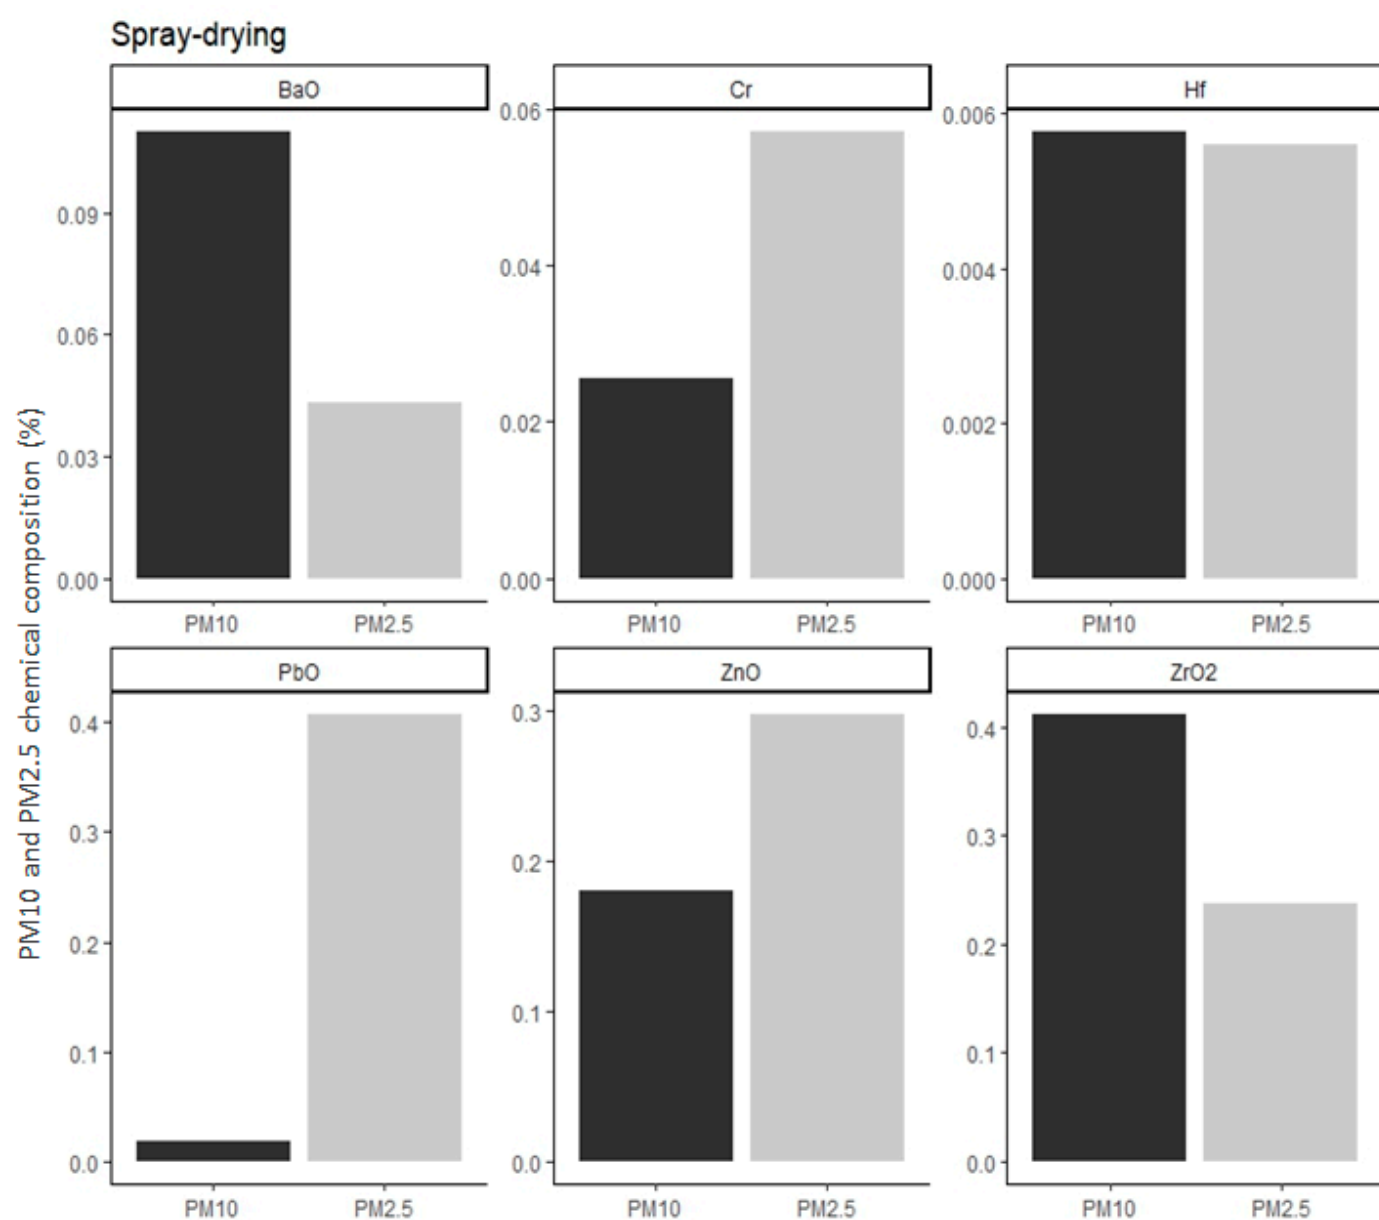

**Figure S4.** PM10 and PM2.5 composition of spray-drying emissions

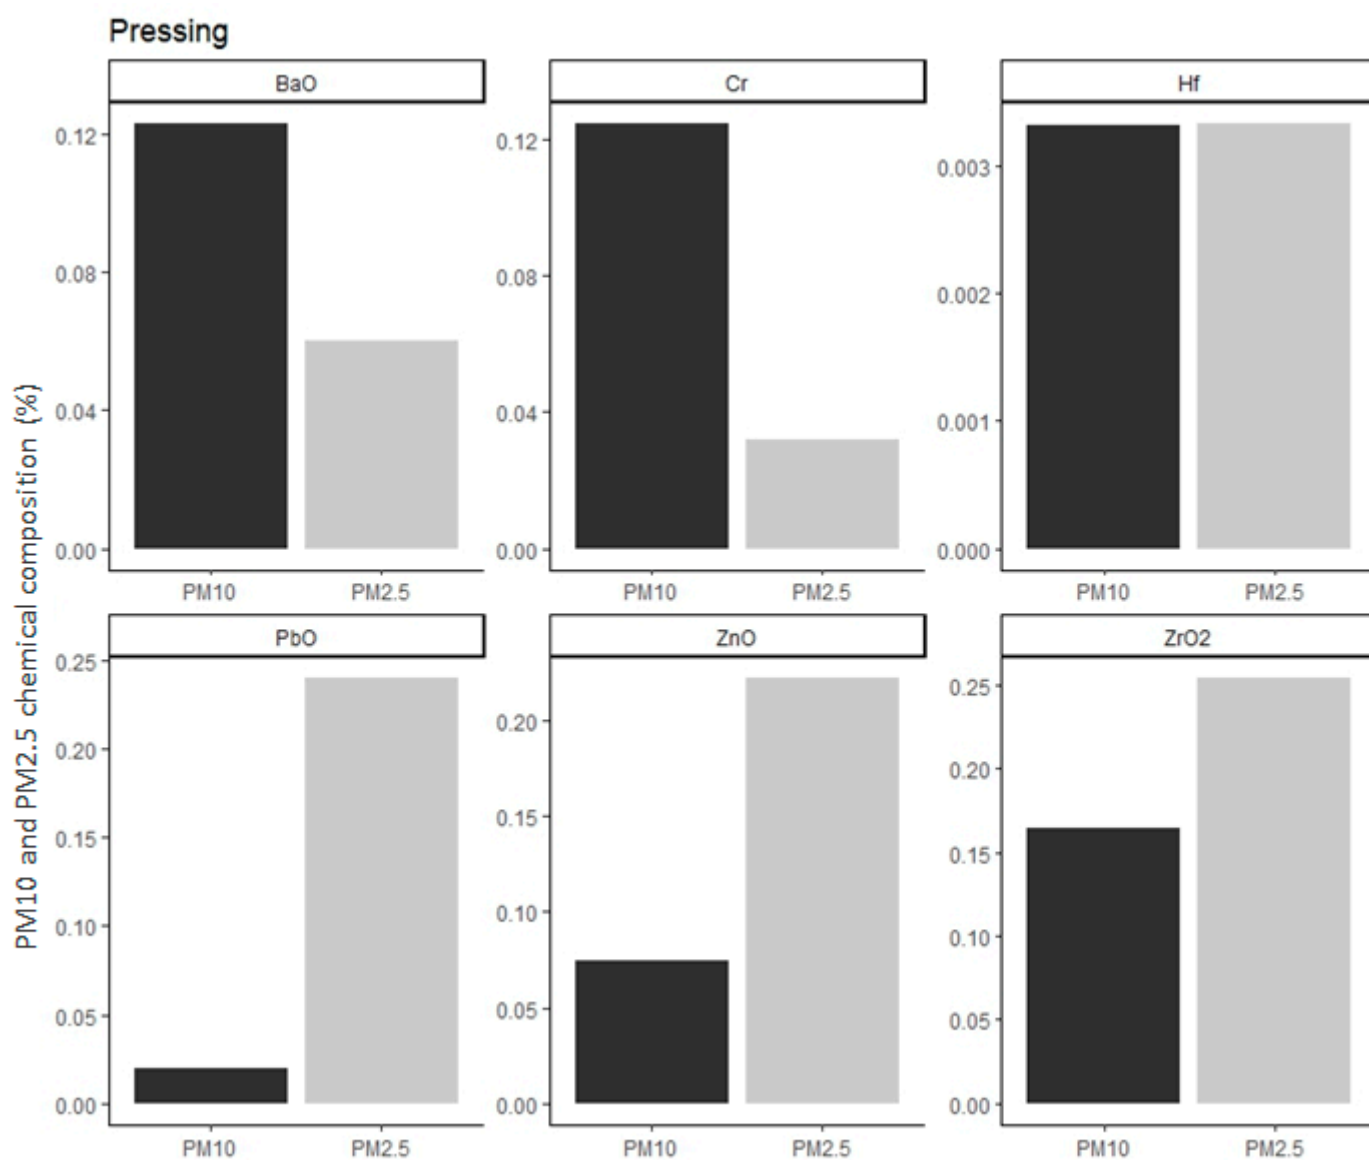

**Figure S5.** PM10 and PM2.5 composition of pressing

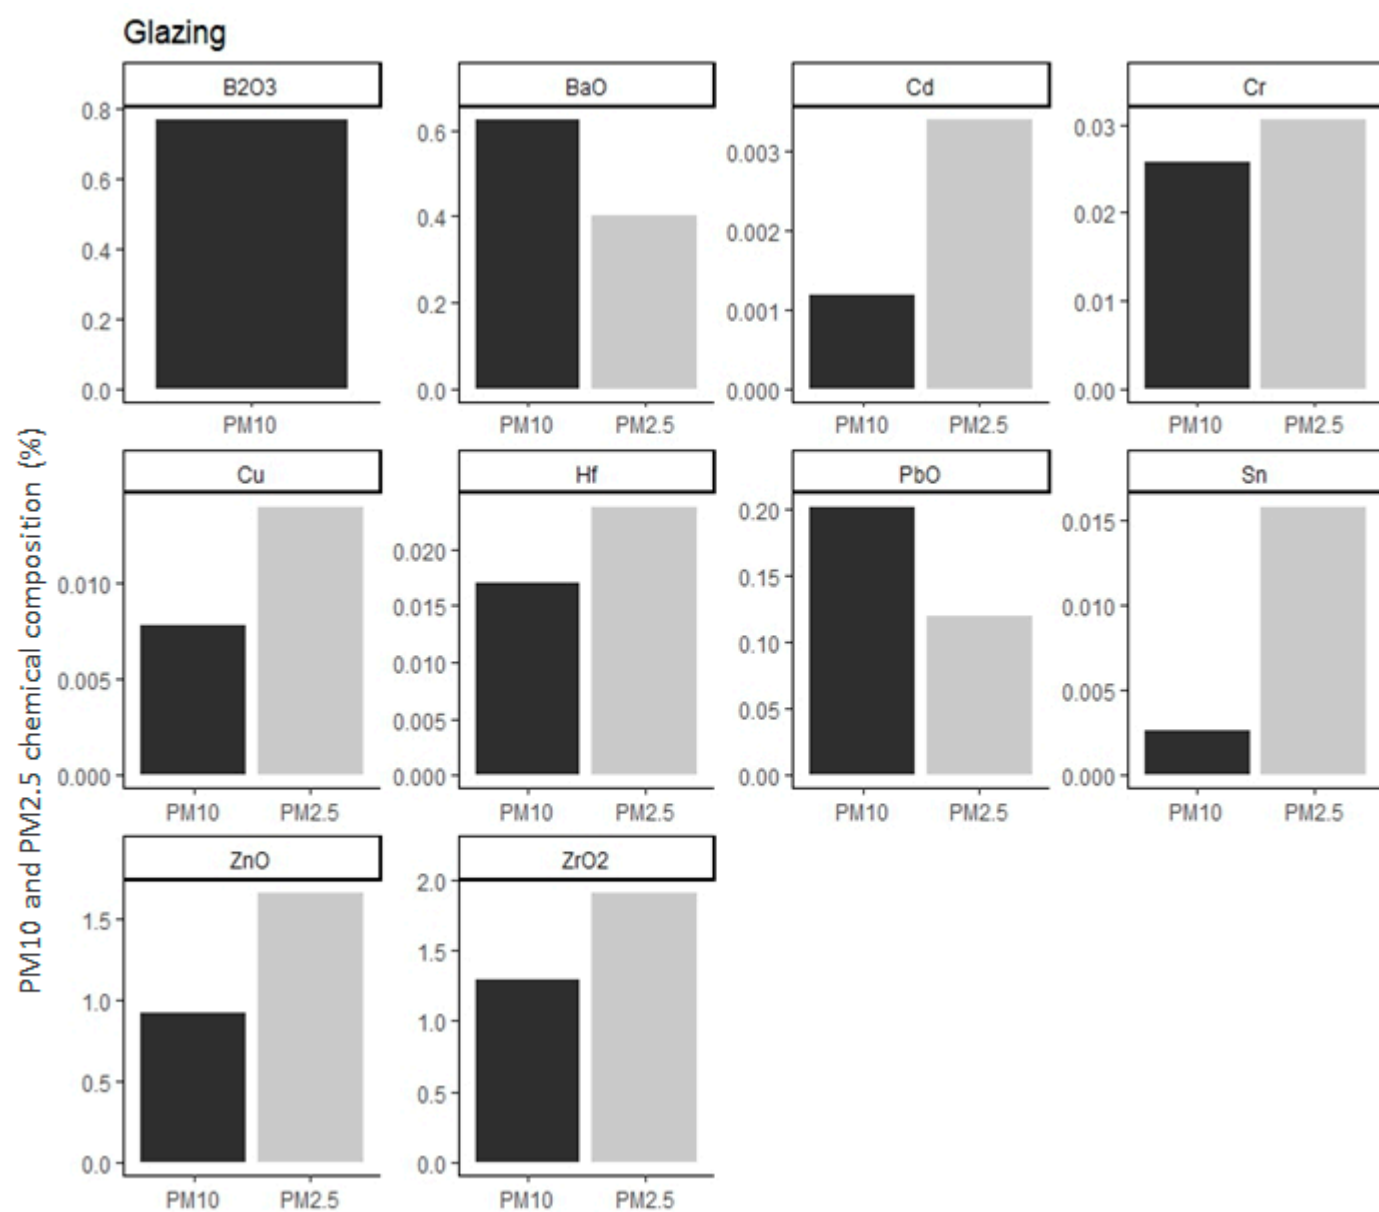

**Figure S6.** PM10 and PM2.5 composition of glazing



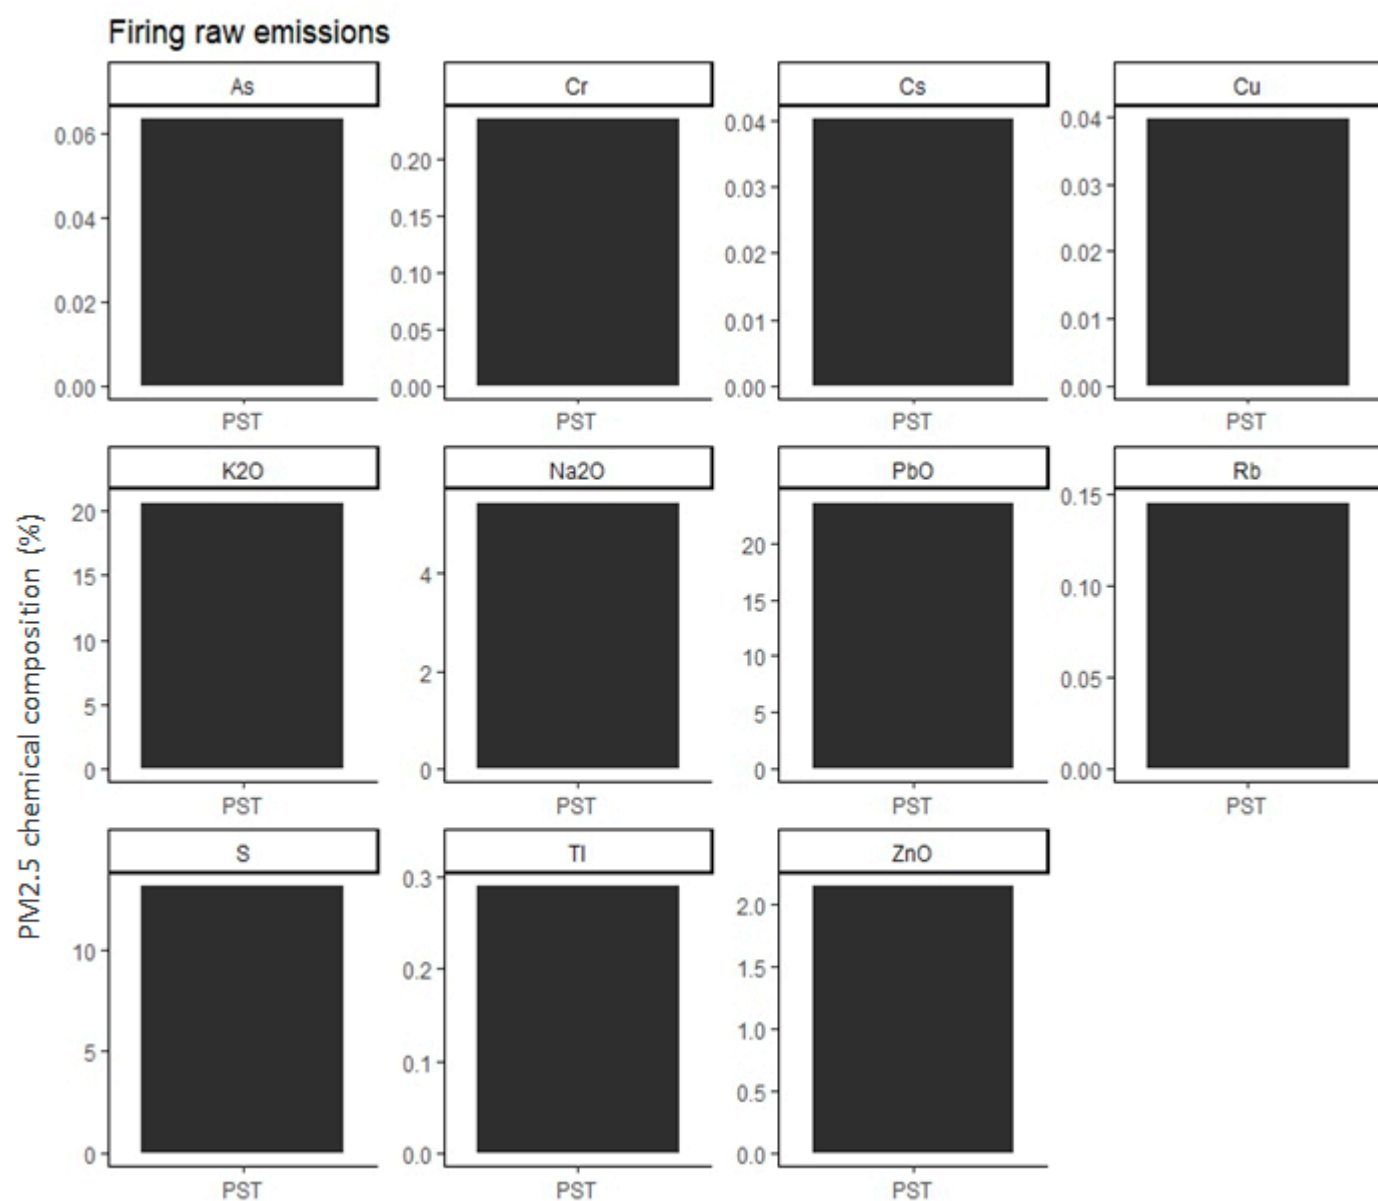

**Figure S7.** PM10 and PM2.5 composition of emissions generated during firing (raw emissions). Only TSP was analysed because PM2.5 represents more than 90% of TSP.

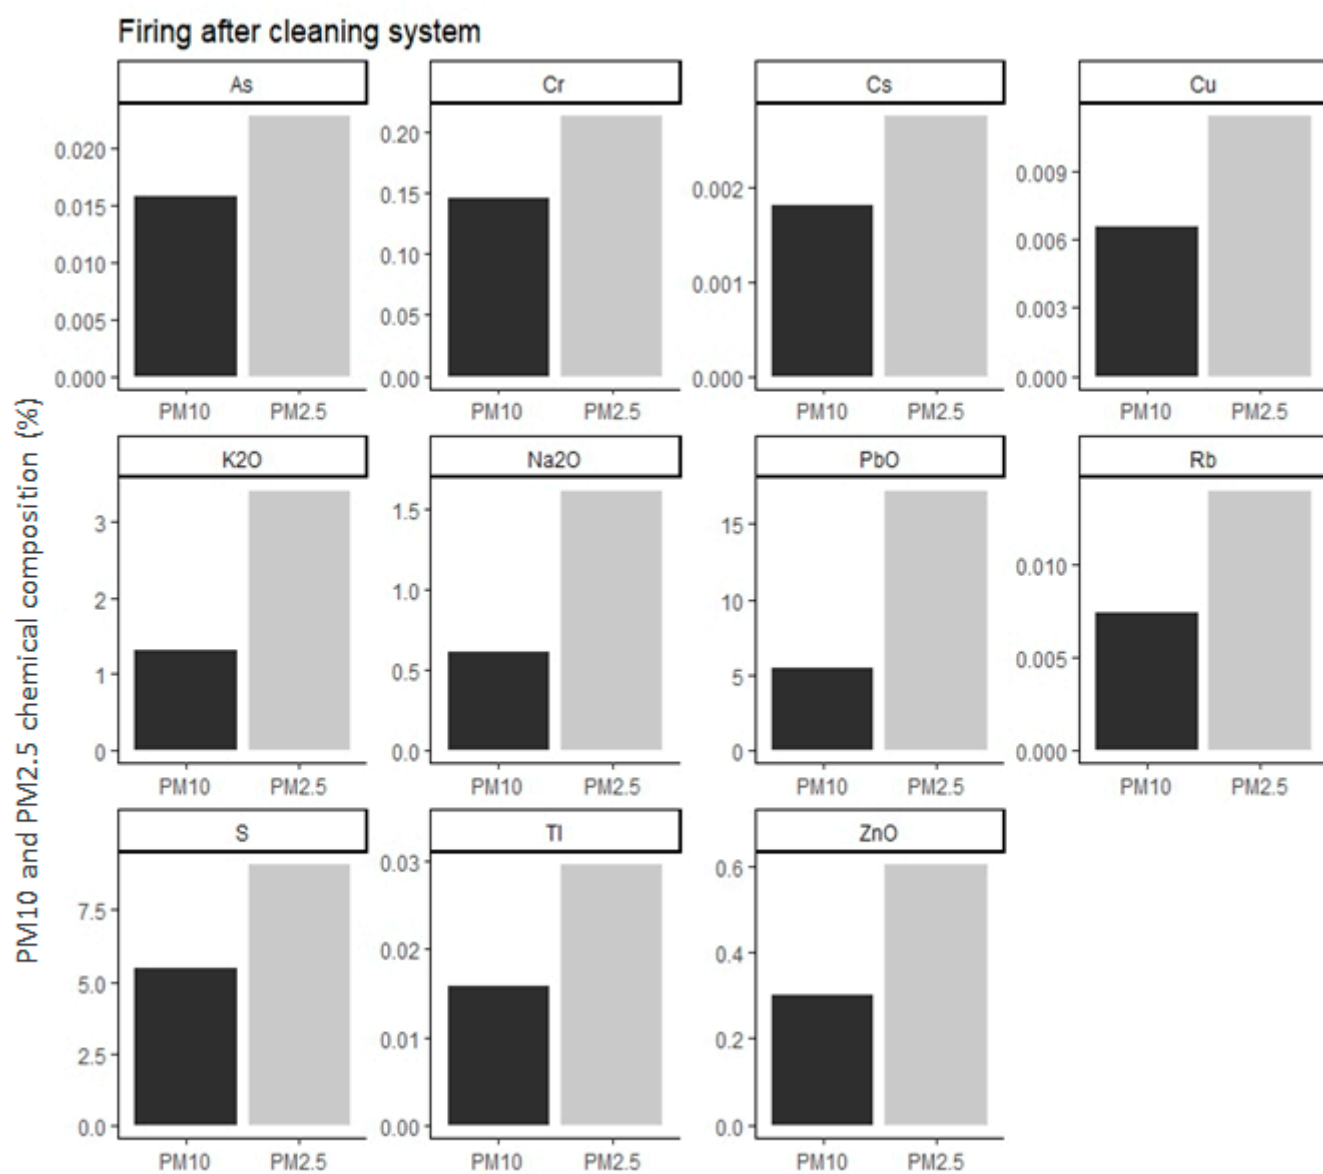

**Figure S8.** PM10 and PM2.5 composition of emissions generated during firing (after cleaning system).

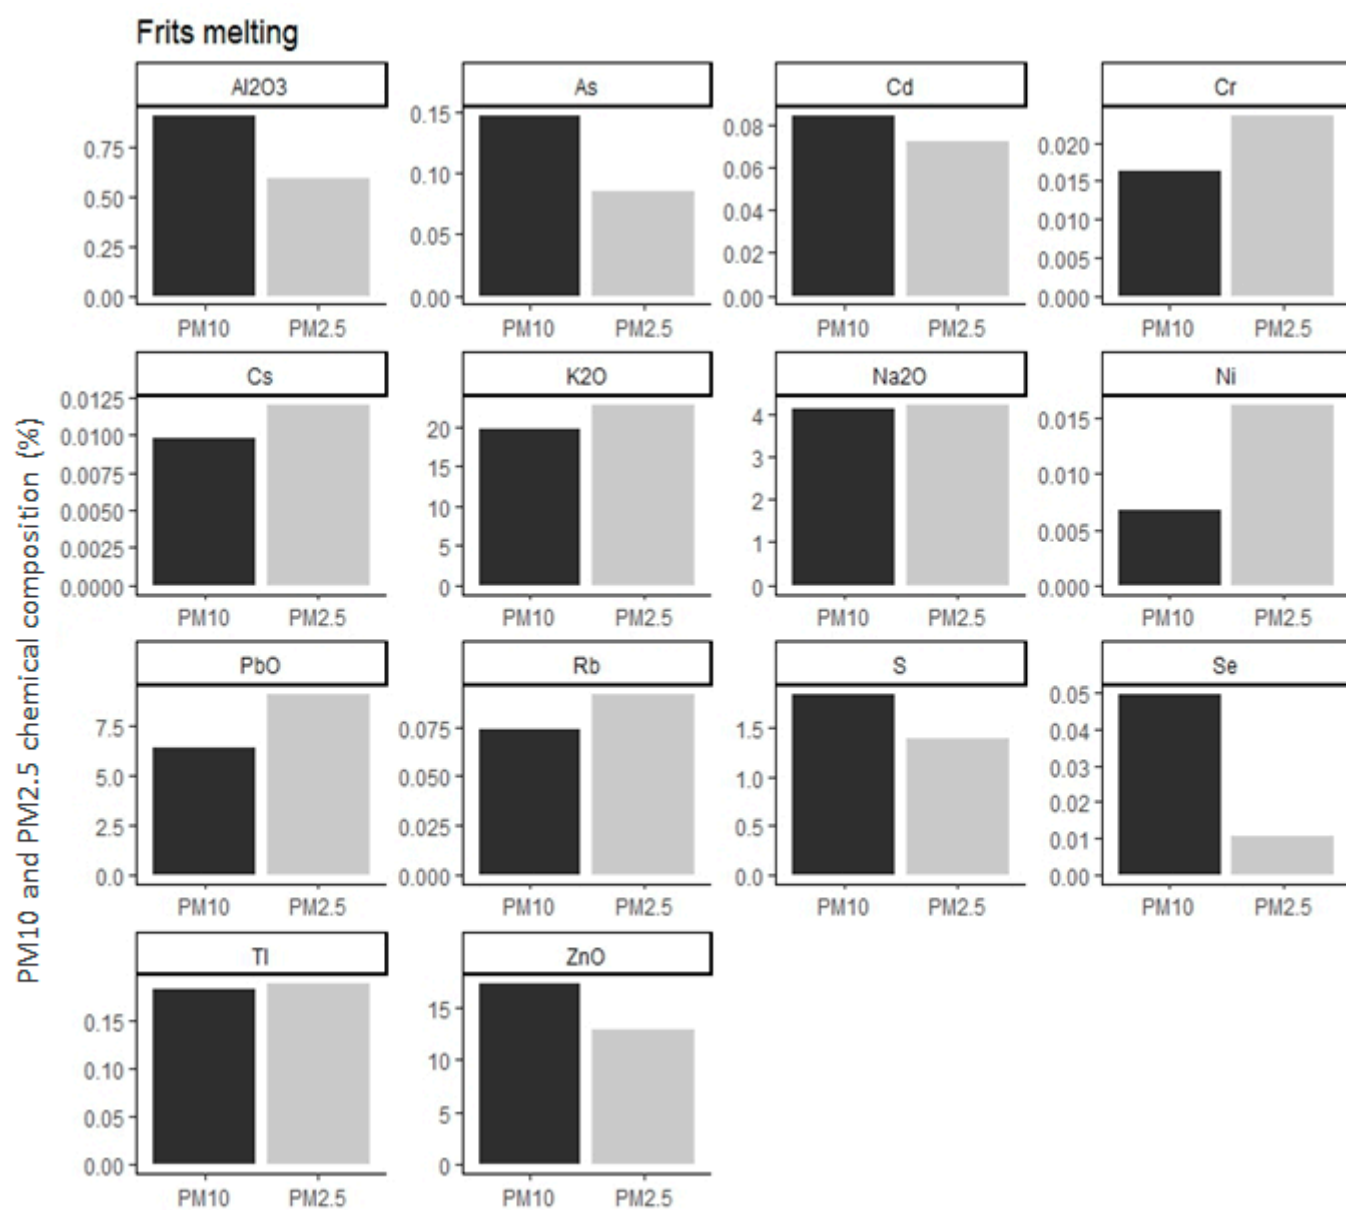

**Figure S9.** PM10 and PM2.5 composition of f emissions generated during frit melting
